# Supplementary material for: Design of extractive distillation process with mixed entrainer
Source: publisher site journal article supplement (doi:10.1515/chempap-2015-0247), 2015-01-30
Supplement: Supplementary file 1 [file chempap-2015-0247_supplement.docx]

**SUPPLEMENTARY DATA**

Design of an extractive distillation process with mixed entrainer

**Aleksandra Yu. Sazonova[[1]](#footnote-1)*, Valentina M. Raeva, Alla K. Frolkova**

*Lomonosov Moscow State University of Fine Chemical Technologies, Vernadsky avenue 86, 119571 Moscow, Russia*

Received 13 June 2015; Revised 1 October 2015; Accepted 21 October 2015

| (a) |
| --- |
|  |
| (b) |
|  |

Fig. S1. Dependence of THF (1) volatility in relation to water (2) versus composition of mixed entrainer DMSO (3) – glycerol (4) for different amount of binary entrainer at 101.32 kPa:

(a) composition of mixture to be separated – x1=0.25 mole fraction, (b) composition of mixture to be separated – x1=0.75 mole fraction.

х3 – molar fraction of component (3) in mixed entrainer

| (a) |
| --- |
|  |
| (b) |
|  |

Fig. S2. Dependence of acetone (1) volatility in relation to methanol (2) versus composition of mixed entrainer monoethanolamine (3) – ethylene glycol (4) for different amount of binary entrainer at 101.32 kPa:

1. composition of mixture to be separated – x1=0.25 mole fraction, (b) composition of mixture to be separated – x1=0.75 mole fraction.

х3 – molar fraction of component (3) in mixed entrainer

**Table S1.** Parameters of binary interactions of the NRTL model

| i – j | Aij (Jmol-1) | Aji (Jmol-1) | Bij (Jmol-1.K) | Bij (Jmol-1.K) | αij |
| --- | --- | --- | --- | --- | --- |
| THF – water | 0.47726 | 4.6818 | 399.2826 | -703.1788 | 0.4756 |
| THF – DMSO | - | - | 351.9315 | 75.5055 | 0.3000 |
| THF – glycerol | - | - | 1298,875 | 75,512 | 0.3000 |
| Water – DMSO | -1.1477 | 1.7439 | 554.7817 | -1126.271 | 0.3000 |
| Water – glycerol | -1.0937 | -0.7026 | 226.6530 | 157.4594 | 0.3000 |
| DMSO – glycerol | - | - | 81.335 | -649.14 | 0.3000 |
| Acetone – methanol | - | - | 88.3797 | 126.178 | 0.3000 |
| Acetone – MEA | - | - | 599.614 | -98.522 | 0.3000 |
| Acetone – EG | - | - | 390.7269 | 241.6096 | 0.3000 |
| Methanol – MEA | - | - | -1050,56 | 2751,967 | 0.3000 |
| Methanol – EG | 33,519 | 1,0326 | -10000,0 | -620,696 | 0.3000 |
| MEA – EG | - | - | 122,119 | -210,494 | 0.3000 |

|  | (d) |  | (а) |
| --- | --- | --- | --- |
|  | (e) |  | (b) |
|  |  |  | (c) |

Fig. S3 Temperature profiles in ED column in the process of separating THF from water at 101.32 kPa with (а) DMSO (Mode 1, Table 1); (b) glycerol (Mode 2, Table 1); (c) binary pre-mixed DMSO – glycerol (Mode 3, Table 1); (d) DMSO and glycerol fed on two different levels, DMSO above (Mode 4, Table 1); (e) DMSO and glycerol fed on two different levels, glycerol above (Mode 5, Table 1); i – THF, j – water, Ent3 – DMSO, Ent4 – glycerol.

|  | (d) |  | (а) |
| --- | --- | --- | --- |
|  | (e) |  | (b) |
|  |  |  | (c) |

Fig. S4. Temperature profiles in ED column in the process of separating acetone from methanol at 101.32 kPa with (а) MEA (Mode 2, Table 2); (b) binary pre-mixed MEA – EG (Mode 3, Table 2); (c) binary pre-mixed MEA – EG (Mode 4, Table 2); (d) MEA and EG fed on two different levels, MEA above (Mode 5, Table 2); (e) MEA and EG fed on two different levels, EG above (Mode 6, Table 2); i – acetone, j – methanol, Ent3 – MEA, Ent4 – EG.

Table S2. Expanded version of Table 1 (Parameters of ED column and energy consumptions for THF – water system separation with DMSO, glycerol and DMSO – glycerol (N=20 theoretical trays, NF=16, F0=100 kmol/h, FEnt=20 kmol/h, purity of distillate product 0.9990 m.f. THF, ТF0,ТEnt=333.15 К)).

| Mode | NEnt3 | NEnt4 | R | Entrainer composition, m.f. | | Entrainer flow, kmol/h | | TD, K | Bottom | | | | | Qreb(I), kW | ΣQreb(I+II), kW |
| --- | --- | --- | --- | --- | --- | --- | --- | --- | --- | --- | --- | --- | --- | --- | --- |
| XEnt3 | ХEnt4 | Ent3 | Ent4 | x1 | x2 | XEnt3 | ХEnt4 | TB, K |
| 1 | 4 | - | 0.41 | 1.0 | - | 20 | - | 339.08 | 0.0007 | 0.7137 | 0.2856 | - | 385.91 | 650.7 | 1511.3 |
| 2 | - | 4 | 0.26 | - | 1.0 | - | 20 | 339.07 | 0.0007 | 0.7136 | - | 0.2857 | 384.34 | 657.2 | 1458.4 |
| 3 | 4 | 4 | 0.32 | 0.5 | 0.5 | 10 | 10 | 339.07 | 0.0007 | 0.7136 | 0.1428 | 0.1429 | 383.75 | 646.5 | 1412.1 |
| 4 | 4 | 10 | 0.35 | 0.5 | 0.5 | 10 | 10 | 339.08 | 0.0007 | 0.7137 | 0.1427 | 0.1429 | 383.73 | 649.6 | 1415.0 а |
| 5 | 10 | 4 | 0.34 | 0.5 | 0.5 | 10 | 10 | 339.07 | 0.0007 | 0.7136 | 0.1429 | 0.1429 | 383.76 | 646.7 | 1412.1 а |

а Energy consumptions for column III are not included in the Table, Qreb(III)=397.6 kW (Fig. 2b); NEnt3 – feed tray of DMSO, NEnt4 – feed tray of glycerol.

**Table 2.** Parameters of ED column and energy consumptions for acetone – methanol system separation with MEA, EG, and MEA – EG (N=25 theoretical trays, NF=10, F0=100 kmol/h, FEnt=150 kmol/h, purity of distillate product 0.9990 m.f. acetone, ТF0=327.15 К and ТEnt=313.15К).

| Mode | NEnt3 | NEnt4 | R | Entrainer composition, m.f. | | Entrainer flow, kmol/h | | TD,K | Bottom | | | | | Qreb(I), kW | ΣQreb(I+II), kW |
| --- | --- | --- | --- | --- | --- | --- | --- | --- | --- | --- | --- | --- | --- | --- | --- |
| XEnt3 | ХEnt4 | Ent3 | x1 | x1 | x2 | XEnt3 | ХEnt4 | TB, K |
| 1 а | - | 4 | - | - | 1.0 | - | 150 | - | - | - | - | - | - | - | - |
| 2 | 4 | - | 0.64 | 1.0 | - | 150 | - | 329.28 | 0.0002 | 0.2498 | 0.7500 | - | 414.97 | 1359.4 | 2854.5 |
| 3 b | 5 | 5 | 0.12 | 0.75 | 0.25 | 112.5 | 37.5 | 329.32 | 0.0003 | 0.2500 | 0.5622 | 0.1875 | 403.76 | 1069.7 | 2805.8 |
| 4 | 5 | 5 | 0.58 | 0.5 | 0.5 | 75 | 75 | 329.28 | 0.0002 | 0.2498 | 0.3750 | 0.3750 | 392.76 | 1220.6 | 4187.7 |
| 5 b | 5 | 6 | 0.14 | 0.75 | 0.25 | 112.5 | 37.5 | 329.32 | 0.0003 | 0.2500 | 0.5622 | 0.1875 | 403.76 | 1066.1 | 2802.2 c |
| 6 b | 6 | 5 | 0.11 | 0.75 | 0.25 | 112.5 | 37.5 | 329.28 | 0.0002 | 0.2498 | 0.5625 | 0.1875 | 403.83 | 1052.1 | 2788.2 c |

аQuality 0.9990 m.f. of acetone is not reachable at given total flow of EG, bsynergetic effect composition, cenergy consumptions for column III are not included in the Table, Qreb(III)=6255 kW (Fig. 2b); NEnt3 – feed tray of MEA, NEnt4 – feed tray of EG.

1. *Corresponding author, e-mail: amelyschafe@mail.ru [↑](#footnote-ref-1)
